# Supplementary material
Source: MDPI journal article supplement (https://www.mdpi.com/2673-9976/26/1/60)
Supplement: s1 [file s1]

**Foods  
2023**

**The 4th International Electronic Conference  
on Foods**

15–30 October | Online

Chaired by **Prof. Dr. Arun K. Bhunia**

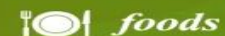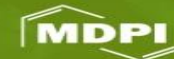

# The potential use of synbiotic combinations in cereal-based solid food products- A review

Gamze Nil Yazici\*, Ozum Ozoglu, Tansu Taspinar,  
Isilay Yilmaz, Mehmet Sertac Ozer

\*Cukurova University, Faculty of Engineering, Food Engineering Department, Adana, TURKEY

\*gnboran@cu.edu.tr

# Introduction

---

## SYNbiotic

- “A mixture comprising live microorganisms and substrate(s) selectively utilized by host microorganisms that confers a health benefit on the host” (Swanson, 2020).

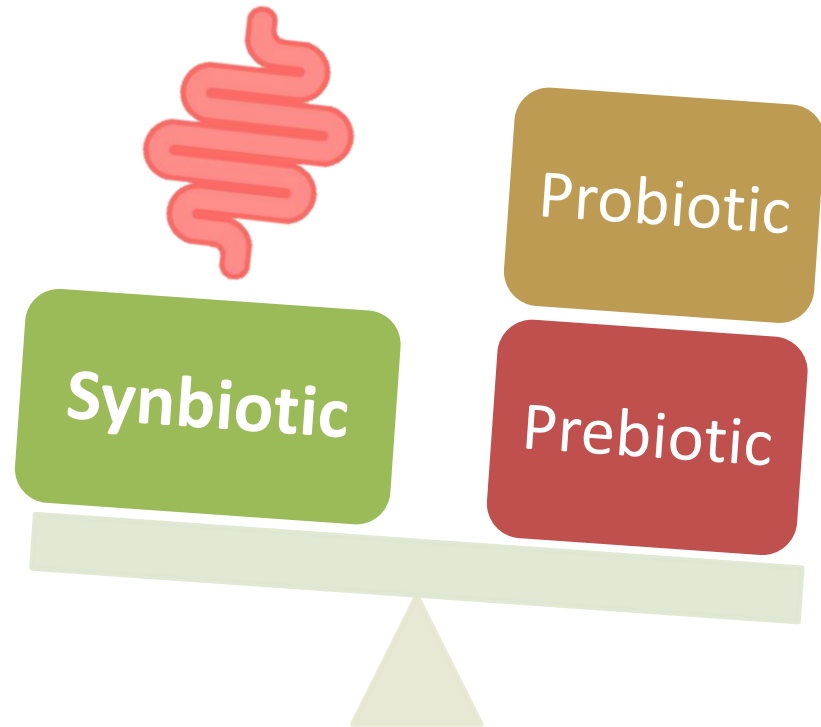

# Introduction

---

## SYNbiotic

### Complementary synbiotic

- Probiotic(s) + prebiotic(s) working to achieve one or more health benefits
- Comprises a probiotic plus a prebiotic (more than one of each can be used), working independently to achieve one or more health benefits.
- Probiotic and prebiotic components of the complementary synbiotic must meet the minimum criteria.
- Must be tested in the target host demonstrating a health benefit
- Do not need to also demonstrate selective utilization as this has been previously demonstrated by the prebiotic

### Synergistic synbiotic

- Substrate selected to specifically enhance the health benefit delivered by the co-administered live microorganism
- Composed of a live microorganism and a selectively utilized substrate but neither needs to meet the minimum criteria stipulated previously for probiotics and prebiotics. Instead, these components are designed to work together, with the substrate being selectively utilized by the co-administered microorganism.
- Must be tested in the target host
- Must demonstrate both selective utilization and a health benefit
- On its own, the live microorganism need not meet the criteria of a probiotic
- On its own, the substrate need not meet the criteria of a prebiotic

# Introduction

---

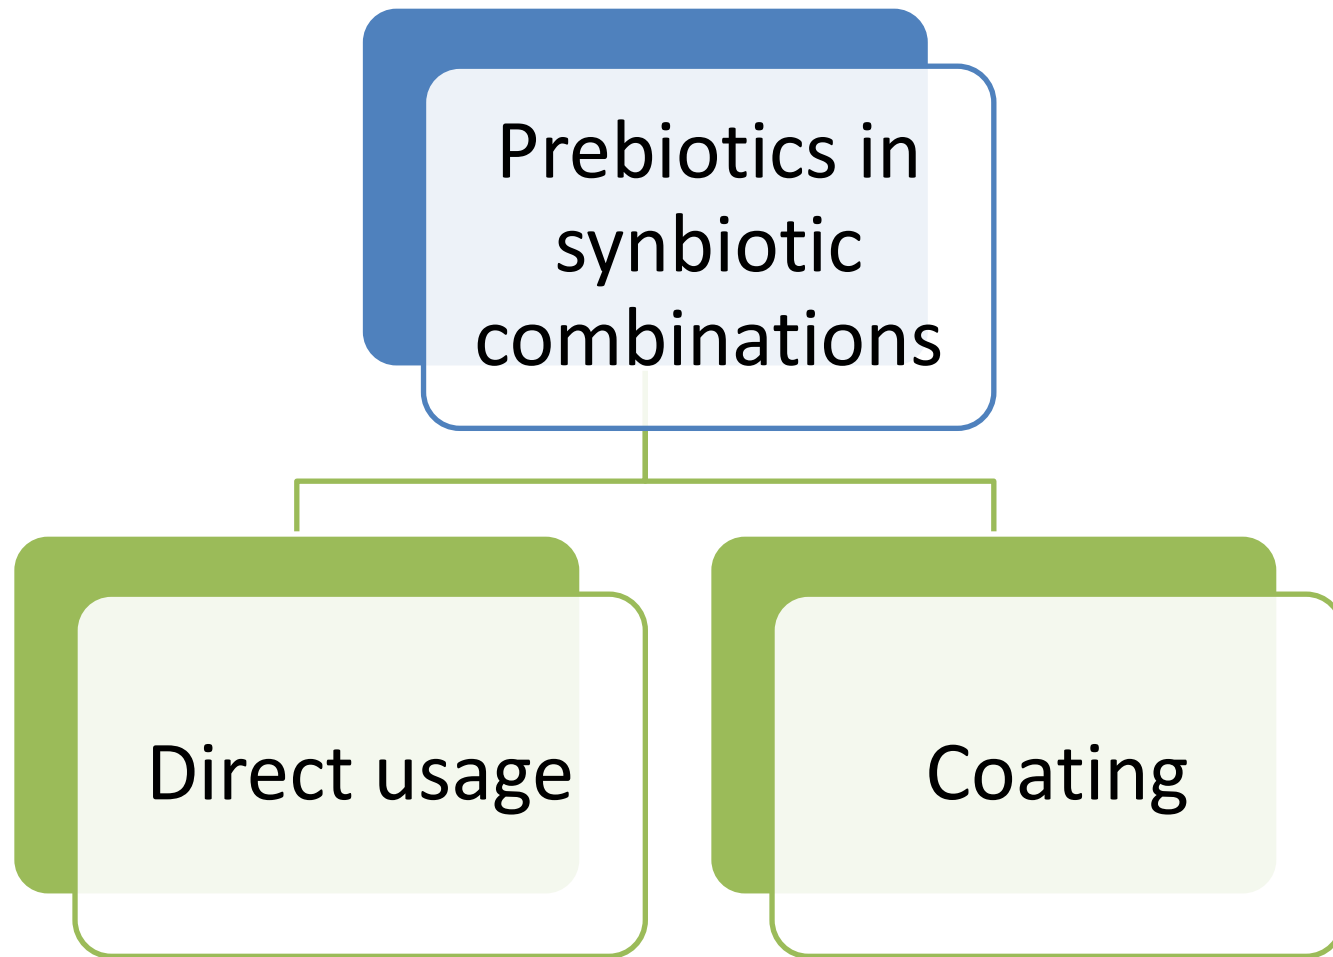

# Introduction

---

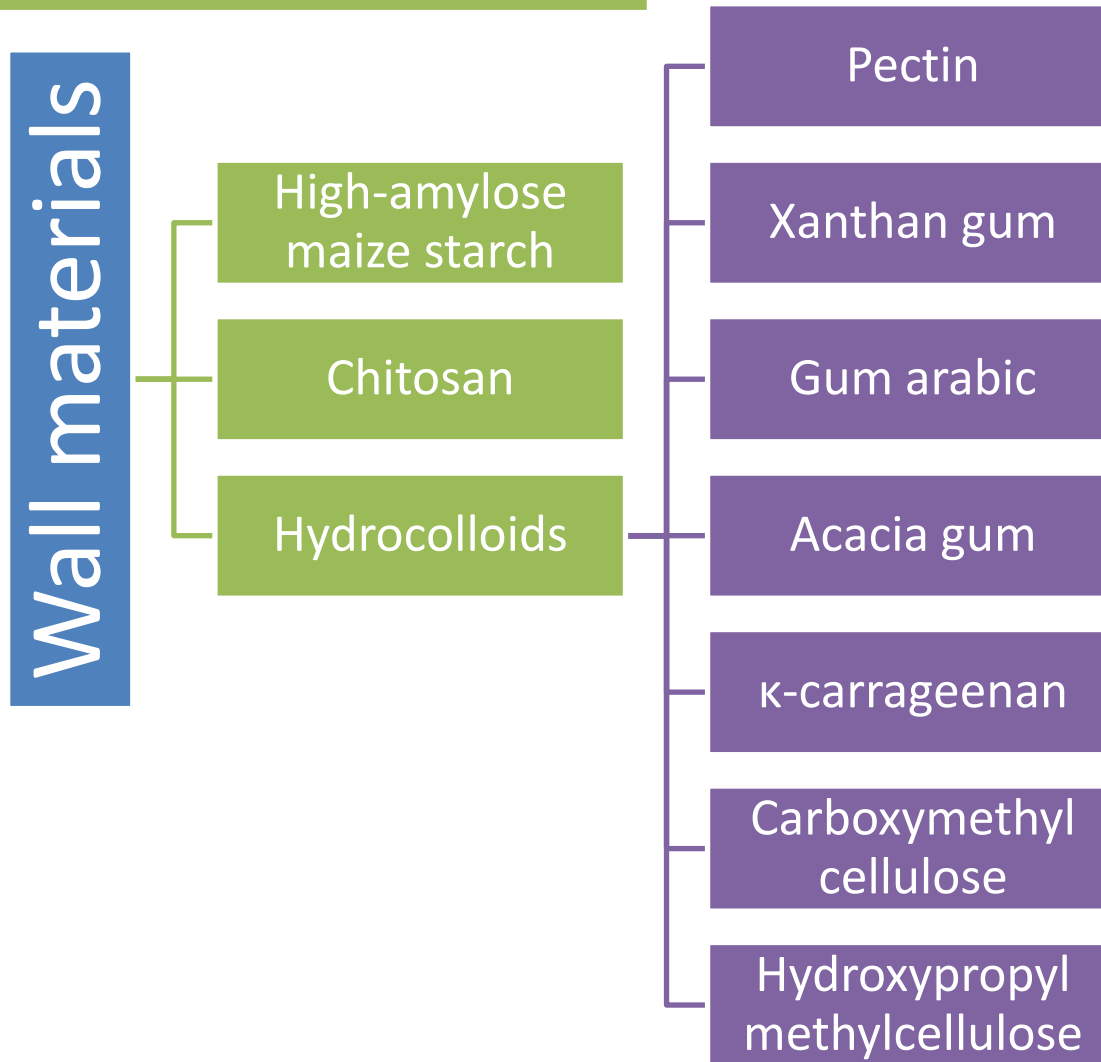

# Introduction

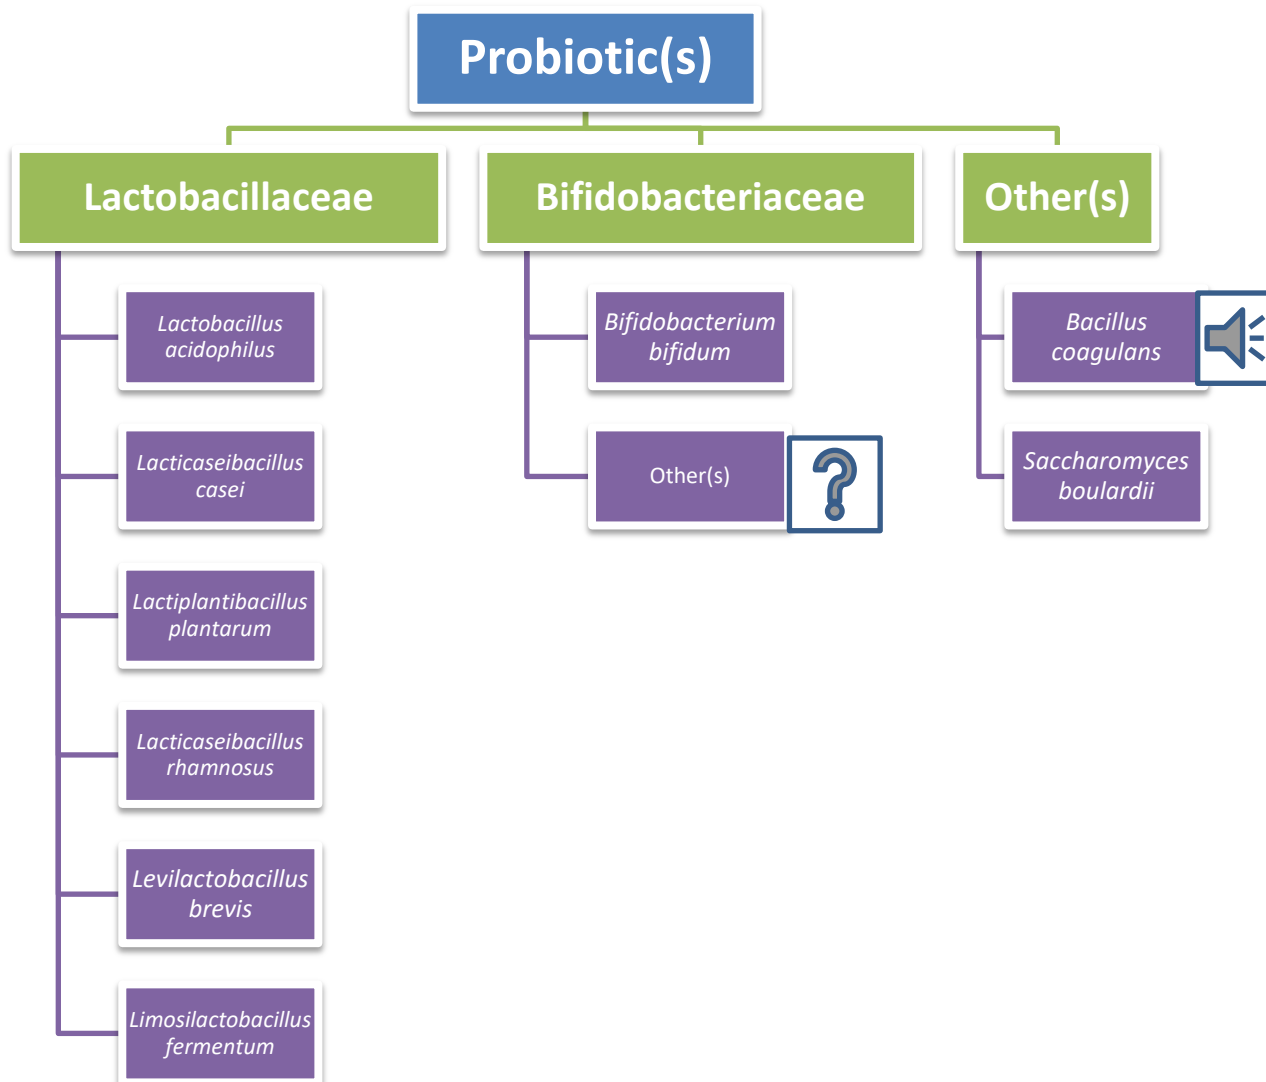

# Cake

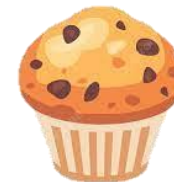

Table 1. The potential use of synbiotic combinations in cakes

| Product                         | Probiotic source(s)                                                                                | Prebiotic or potential prebiotic source(s)                                               | References             |
|---------------------------------|----------------------------------------------------------------------------------------------------|------------------------------------------------------------------------------------------|------------------------|
| Cupcake                         | <i>Lactiplantibacillus plantarum</i>                                                               | Pectin <sup>b</sup> , maltodextrin <sup>b</sup>                                          | Dong et al., 2020a     |
| Cupcake                         | <i>Lactiplantibacillus plantarum</i>                                                               | κ-carrageenan <sup>b</sup>                                                               | Dong et al., 2020b     |
| Cream-filled cake               | <i>Lactocaseibacillus casei</i>                                                                    | High-amylose resistant starch <sup>b</sup>                                               | Zanjani et al., 2012   |
| Cake                            | <i>Saccharomyces boulardii</i> , <i>Lactobacillus acidophilus</i> , <i>Bifidobacterium bifidum</i> | Gum arabic <sup>b</sup> , β-cyclodextrin <sup>b</sup>                                    | Tontul et al., 2018    |
| Fermented rice cake (Khao-Maak) | <i>Saccharomyces boulardii</i>                                                                     | Germinated black glutinous rice <sup>a</sup>                                             | Cheirsilp et al., 2023 |
| Muffin                          | <i>Lactiplantibacillus plantarum</i>                                                               | <i>Stevia rebaudiana</i> <sup>a</sup>                                                    | Lieu et al., 2022      |
| Gluten-free cake mix            | <i>Bacillus coagulans</i>                                                                          | Inulin <sup>a</sup> , resistant starch <sup>a, x, z</sup> , maltodextrin <sup>a, x</sup> | Amini et al., 2022     |

a: direct usage, b: coating, x: used as an fat replacer, y: used as a sugar replacer, t: prebiotics were used in yoghurt for tarhana production, z: type of resistant starch is not defined

# Biscuit/cookie

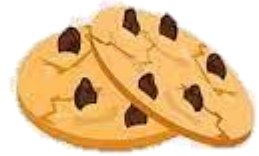

Table 2. The potential use of synbiotic combinations in biscuit/cookie

| Product             | Probiotic source(s)                                                                                           | Prebiotic or potential prebiotic source(s)                                                            | References                  |
|---------------------|---------------------------------------------------------------------------------------------------------------|-------------------------------------------------------------------------------------------------------|-----------------------------|
| Cracker             | <i>Lactocaseibacillus casei</i>                                                                               | Inulin <sup>b</sup> , whey <sup>b</sup> , gelatine <sup>b</sup>                                       | Garcia-Argueta et al., 2016 |
| Biscuit cream       | <i>Lactobacillus acidophilus</i> ,<br><i>Lactocaseibacillus rhamnosus</i> ,<br><i>Bifidobacterium bifidum</i> | Inulin <sup>b</sup> , guar gum <sup>b</sup> , xanthan gum <sup>b</sup> ,<br>maltodextrin <sup>b</sup> | Muzaffar and Sharma, 2018   |
| Gluten-free cookie  | <i>Levilactobacillus brevis</i>                                                                               | Inulin <sup>a, x</sup>                                                                                | Chavez et al., 2022         |
| Gluten-free biscuit | <i>Lactobacillus acidophilus</i>                                                                              | Inulin <sup>b</sup> , fructooligosaccharide <sup>b</sup>                                              | Sumanti et al., 2020        |

a: direct usage, b: coating, x: used as an fat replacer, y: used as a sugar replacer, t: prebiotics were used in yoghurt for tarhana production, z: type of resistant starch is not defined



# Pasta/noodle

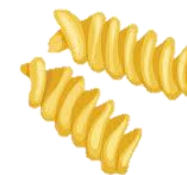

Table 3. The potential use of synbiotic combinations in pasta/noodle

| Product           | Probiotic source(s)                                                                                                  | Prebiotic or potential prebiotic source(s) | References            |
|-------------------|----------------------------------------------------------------------------------------------------------------------|--------------------------------------------|-----------------------|
| Pasta             | <i>Bacillus coagulans</i>                                                                                            | Barley flour <sup>a</sup>                  | Fares et al., 2015    |
| Pasta             | <i>Lactiplantibacillus plantarum</i> ,<br><i>Lactobacillus acidophilus</i> ,<br><i>Limosilactobacillus fermentum</i> | β-glucan <sup>a</sup>                      | Arena et al., 2014    |
| Noodle            | <i>Lactiplantibacillus plantarum</i>                                                                                 | Fructooligosaccharide <sup>b</sup>         | Rajam et al., 2015    |
| Whole-grain pasta | <i>Bacillus coagulans</i>                                                                                            | β-glucan <sup>a</sup>                      | Angelino et al., 2019 |

a: direct usage, b: coating, x: used as an fat replacer, y: used as a sugar replacer, t: prebiotics were used in yoghurt for tarhana production, z: type of resistant starch is not defined

# Other solid cereal-based foods

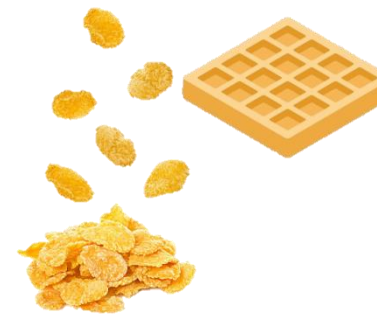

Table 4. The potential use of synbiotic combinations in other cereal-based solid foods

| Product                                           | Probiotic source(s)                                                                                         | Prebiotic and potential prebiotic source(s)                                                                                                             | References            |
|---------------------------------------------------|-------------------------------------------------------------------------------------------------------------|---------------------------------------------------------------------------------------------------------------------------------------------------------|-----------------------|
| Breakfast cereal                                  | <i>Saccharomyces boulardii</i>                                                                              | Acacia gum <sup>b</sup> , methylcellulose <sup>b</sup> , carboxymethylcellulose <sup>b</sup> , modified starch <sup>b</sup> , maltodextrin <sup>b</sup> | Singu et al., 2020    |
| Waffle filling                                    | <i>Lactobacillus acidophilu</i> ,<br><i>Bifidobacterium bifidum</i>                                         | Inulin <sup>a,x</sup> , pectin <sup>b</sup> , lactulose <sup>a,y</sup>                                                                                  | Orgachev et al., 2019 |
| Traditional fermented food <sup>t</sup> (Tarhana) | <i>Streptococcus thermophilus</i> ,<br><i>Lactobacillus acidophilus</i> ,<br><i>Bifidobacterium bifidum</i> | Inulin <sup>a</sup> , lactose <sup>a</sup>                                                                                                              | Shreef et al., 2010   |

a: direct usage, b: coating, x: used as an fat replacer, y: used as a sugar replacer, t: prebiotics were used in yoghurt for tarhana production, z: type of resistant starch is not defined

# Human health

Table 5. Influence of potential synbiotic combinations in solid cereal-based foods on health

| Major findings                                                                                                                                                                                                                                                                                               | References                   |
|--------------------------------------------------------------------------------------------------------------------------------------------------------------------------------------------------------------------------------------------------------------------------------------------------------------|------------------------------|
| <p><b>Feeding of experimental rats with synbiotic biscuits (5g or 10 g in 10 mL aquadest) including <i>L. acidophilus</i>, inulin, and fructo-oligosaccharide:</b></p> <p>Total blood cholesterol level ↓</p> <p>HDL cholesterol ↑</p> <p>LDL cholesterol ↓</p>                                              | <p>Sumanti et al., 2020</p>  |
| <p><b>Consumption of synbiotic whole-grain pasta composed of <i>B. coagulans</i> and β-glucans for 12 weeks by healthy overweight or obese volunteers (n=41):</b></p> <p>Plasma LDL/HDL cholesterol ratio ↓</p>                                                                                              | <p>Angelino et al., 2019</p> |
| <p><b>Consumption of 200g/day dried tarhana, which is prepared from yoghurt containing inulin (3%) and lactulose (3%) fermented by 4.5% probiotic culture, for 45 days by hyperlipidemic volunteers (n=15):</b></p> <p>Total plasma cholesterol ↓</p> <p>Triglycerides ↓</p> <p>Low-density lipoproteins</p> | <p>Shreef et al., 2010</p>   |

# CONCLUSION

- The following in vivo and in vitro studies should center around the survivability of more probiotic microorganisms, especially the lack of *Bifidobacteriaceae* family
- **Optimization of encapsulation process**, with different prebiotic sources at different levels utilized in particularly **gluten-free** cereal-based solid food products
- Not only viability of probiotics with prebiotics but also **nutritional, technological and sensorial** properties of cereal-based solid food products should also be evaluated regarding their synbiotic potential.
- The potential **synbiotic combinations in cereal-based liquid food products such as juices/beverages** should be addressed in other studies.

# REFERENCES

- Amini, K., Sharifan, A., Ghiassi Tarzi, B., & Azizinezhad, R. (2022). Preparation of a Low-Calorie, Gluten-Free All-in-One Cake Mix, Containing Bacillus Coagulans Using Quinoa and Inulin Functionality. *Journal of Food Quality*, 2022. <https://doi.org/10.1155/2022/8550086>
- Angelino, D., Martina, A., Rosi, A., Veronesi, L., Antonini, M., Mennella, I., Vitaglione, P., Grioni, S., Brighenti, F., Zavaroni, I., Fares, C., Torriani, S., & Pellegrini, N. (2019). Glucose- And Lipid-Related Biomarkers Are Affected in Healthy Obese or Hyperglycemic Adults Consuming a Whole-Grain Pasta Enriched in Prebiotics and Probiotics: A 12-Week Randomized Controlled Trial. *Journal of Nutrition*, 149(10), 1714–1723. <https://doi.org/10.1093/jn/nxz071>
- Arena, M. P., Caggianiello, G., Fiocco, D., Russo, P., Torelli, M., Spano, G., & Capozzi, V. (2014). Barley  $\beta$ -glucans-containing food enhances probiotic performances of beneficial bacteria. In *International Journal of Molecular Sciences* (Vol. 15, Issue 2, pp. 3025–3039). <https://doi.org/10.3390/ijms15023025>
- Argueta, I. G., Salazar, B. Q., & Lopez, A. D. (2016). Effect of Edible Coating Based on Whey, Inulin and Gelatine with Lactobacillus casei on the Textural and Sensorial Properties of a Cracker Cookie. *Journal of Probiotics & Health*, 04(03). <https://doi.org/10.4172/2329-8901.1000153>
- Arslan-Tontul, S., Erbas, M., & Gorgulu, A. (2019). The Use of Probiotic-Loaded Single- and Double-Layered Microcapsules in Cake Production. *Probiotics and Antimicrobial Proteins*, 11(3), 840–849. <https://doi.org/10.1007/s12602-018-9467-y>
- Chávez, S., Rodriguez-Herrera, R., Silva, S., Nery, S., Flores, C., & Ruelas, X. (2022). Formulation of a Gluten-free Cookie with Prebiotics and an Edible Cover Enriched with Probiotics. *Letters in Applied NanoBioScience*, 11(2), 3459–3469. <https://doi.org/10.33263/LIANBS112.34593469>
- Cheirsilp, B., Mekpan, W., Sae-ear, N., Billateh, A., & Boukaew, S. (2023). Enhancing Functional Properties of Fermented Rice Cake by Using Germinated Black Glutinous Rice, Probiotic Yeast, and Enzyme Technology. *Food and Bioprocess Technology*, 16(5), 1116–1127. <https://doi.org/10.1007/s11947-022-02985-z>
- Dong, L. M., Luan, N. T., & Thuy, D. T. K. (2020). The viability of encapsulated lactobacillus plantarum during cupcake baking process, storage, and simulated gastric digestion. *Journal of Microbiology, Biotechnology and Food Sciences*, 9(6), 1157–1161. <https://doi.org/10.15414/JMBFS.2020.9.6.1157-1161>
- Dong, L. M., Luan, N. T., & Thuy, D. T. K. (2020). Enhancing the viability rate of probiotic by co-encapsulating with prebiotic in alginate microcapsules supplemented to cupcake production. *Microbiology and Biotechnology Letters*, 48(2), 113–120. <https://doi.org/10.4014/mbi.1910.10015>
- Fares, C., Menga, V., Martina, A., Pellegrini, N., Scazzina, F., & Torriani, S. (2015). Nutritional profile and cooking quality of a new functional pasta naturally enriched in phenolic acids, added with  $\beta$ -glucan and Bacillus coagulans GBI-30, 6086. *Journal of Cereal Science*, 65, 260–266. <https://doi.org/10.1016/j.jcs.2015.07.017>
- Lieu, D. M., Tran, G. T. C., Nguyen, N. T., & Dang, T. K. T. (2022). Effect of Yeast Cell Microcapsules as a Potential Carrier for Improving Lactobacillus plantarum Viability in Muffin Adding Stevia rebaudiana. *Trends in Sciences*, 19(22). <https://doi.org/10.48048/tis.2022.335>
- Mohammad Ali Khosravi Zanjani. (2012). Microencapsulation of Lactobacillus casei with calcium alginate-resistant starch and evaluation of survival and sensory properties in cream-filled cake. *African Journal of Microbiology Research*, 6(26). <https://doi.org/10.5897/ajmr12.972>
- Muzzafar, A., & Sharma, V. (2018). Microencapsulation of probiotics for incorporation in cream biscuits. *Journal of Food Measurement and Characterization*, 12(3), 2193–2201. <https://doi.org/10.1007/s11694-018-9835-z>
- Orgachev, E. I., Korkach, H., Lebedenko, T., & Kotuzaki, O. (2019). Synbiotic Additives in the Waffles Technology. *Food Science and Technology*, 13(1), 19–26. <https://doi.org/10.15673/fst.v13i1.1310>
- Rajam, R., Kumar, S. B., Prabhasankar, P., & Anandharamakrishnan, C. (2015). Microencapsulation of Lactobacillus plantarum MTCC 5422 in fructooligosaccharide and whey protein wall systems and its impact on noodle quality. *Journal of Food Science and Technology*, 52(7), 4029–4041. <https://doi.org/10.1007/s13197-014-1506-4>
- Shreef, G., Zaghloul, A. H., Khalaf-Allah, A. E.-R. M., El-Shimi, N. M., Mohamed, R. S., & Gabriel, G. N. (2010). Synbiotic Tarhana as a functional food. *Journal of American Science*, 6(12), 847–857. <http://www.americanscience.org>
- Singu, B. D., Bhushette, P. R., & Annature, U. S. (2020). Thermo-tolerant *Saccharomyces cerevisiae* var. *boulardii* coated cornflakes as a potential probiotic vehicle. *Food Bioscience*, 36(May), 100668. <https://doi.org/10.1016/j.fbio.2020.100668>
- Sumanti, D. M., Hanidah, I., & Wahyudi, D. N. (2020). Effect of synbiotic biscuit on decreasing cholesterol levels in Wistar rats. *IOP Conference Series: Earth and Environmental Science*, 443(1). <https://doi.org/10.1088/1755-1315/443/1/012022>
- Swanson, K. S., Gibson, G. R., Hutkins, R., Reimer, R. A., Reid, G., Verbeke, K., Scott, K. P., Holscher, H. D., Azad, M. B., Delzenne, N. M., & Sanders, M. E. (2020). The International Scientific Association for Probiotics and Prebiotics (ISAPP) consensus statement on the definition and scope of synbiotics. *Nature Reviews Gastroenterology and Hepatology*, 17(11), 687–701. <https://doi.org/10.1038/s41575-020-0344-2>

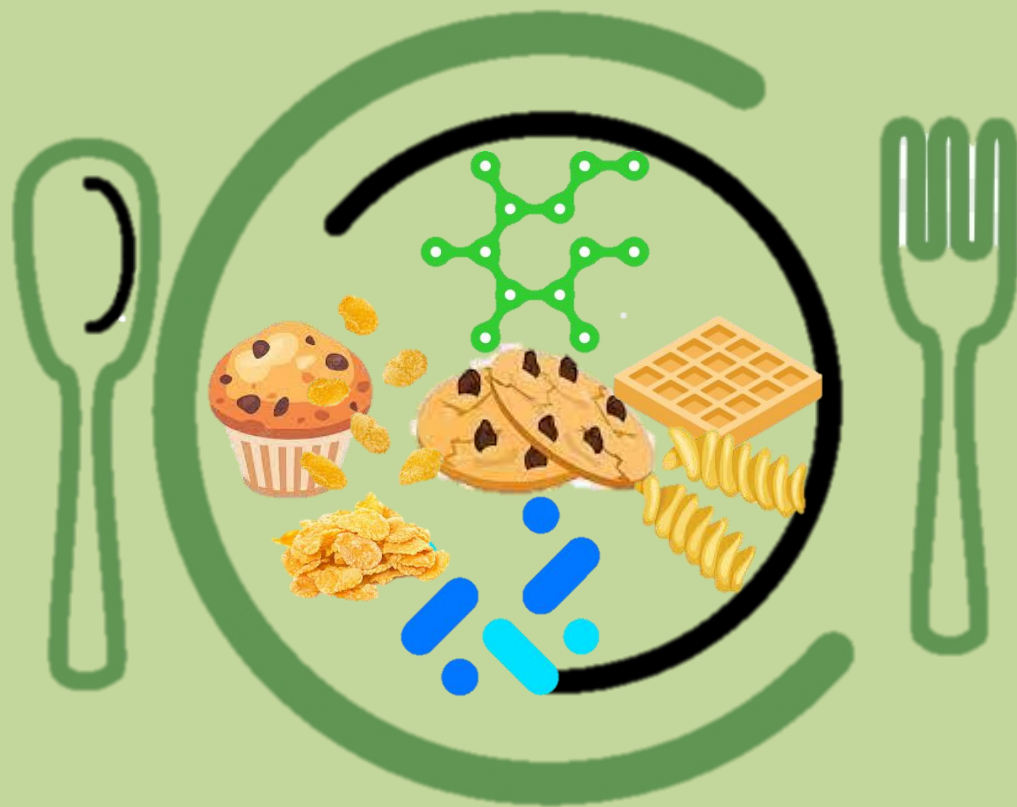

THANK YOU FOR YOUR ATTENTION
